# Supplementary material for: A Compressed Sensing-Based Wearable Sensor Network for Quantitative Assessment of Stroke Patients
Source: MDPI journal article supplement (doi:10.3390/s16020202), 2016-02-05
Supplement: s1 [file s1]

## Introduction of Remote Rehabilitation Training and Assessment Software

- **Author:** Lei Yu, Suzhou Institute of Biomedical Engineering and Technology, Chinese Academy of Sciences (E-mail: [yul@sibet.ac.cn](mailto:yul@sibet.ac.cn); [yuthreestone@gmail.com](mailto:yuthreestone@gmail.com))
- **Run environment:** Windows 32 bit platform, .Net Framework 3.5 above
- **Develop environment:** Microsoft Visual Studio 2010 (C#)
- This soft have the following several functions:
  - Manage the personal information and individual training prescriptions through connect to MySQL database
  - Provide standard videos of 10 clinical common exercises (1. **Bobath handshake**; 2. Elbow extension; 3. Shoulder abduction; 4. Elbow flexion; 5. **Shoulder touch**; 6. Pronation-supination; 7. Wrist pressing; 8. Finger touch; 9. Cylinder grip; 10. Ball catch)
  - Real time sampling and plot of accelerometer signals (only feature axis is plotted)
  - Data save to disk (.bin format) and write to MySQL database
  - Automatic Brunnstrom stage classification and Scoring (centesimal system)

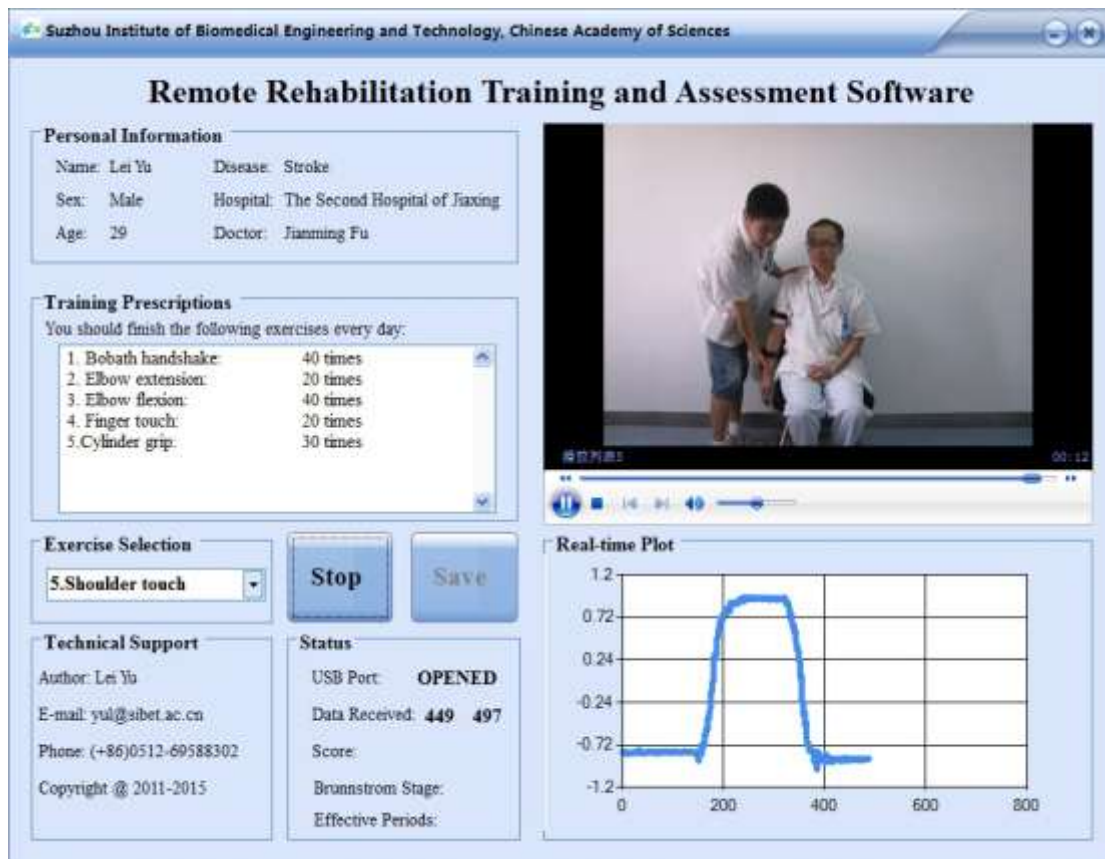

Figure 1 Real time sampling and plot

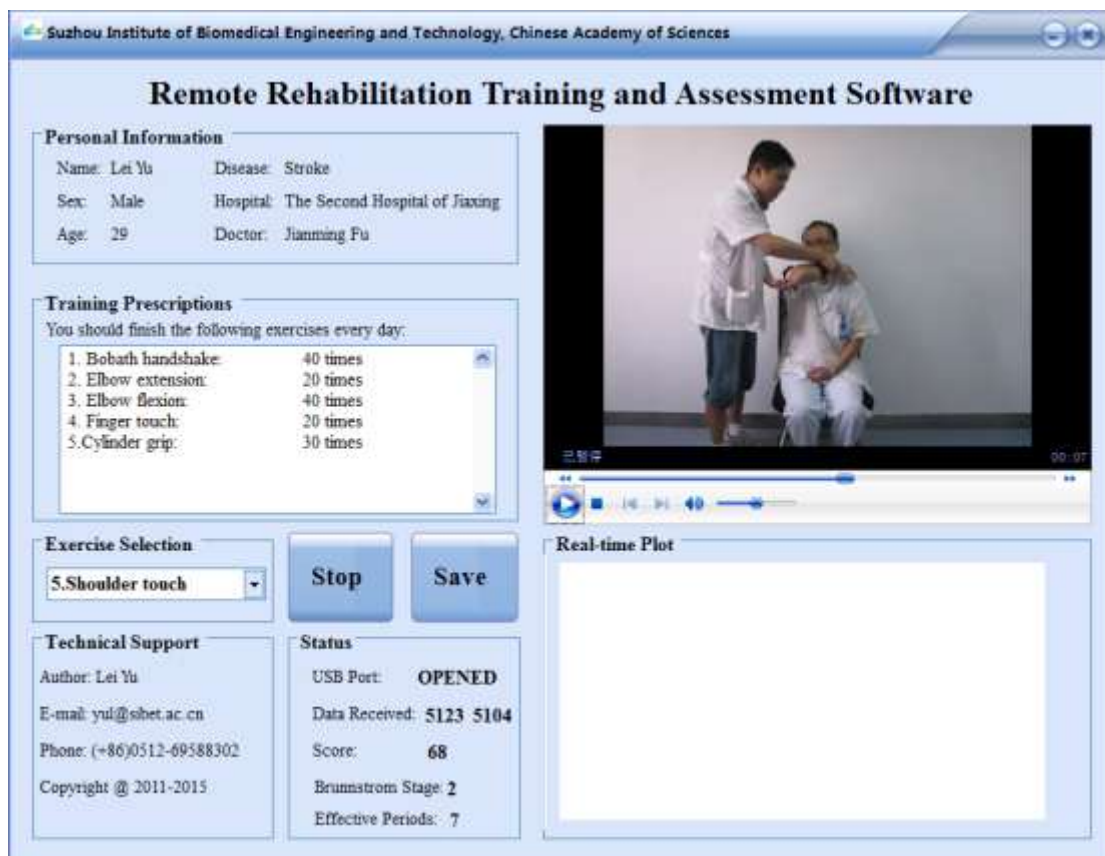

Figure 2 Automatic Brunnstrom stage classification and scoring
